# Supplementary material
Source: PubMed Central journal article supplement (PMC9117519)

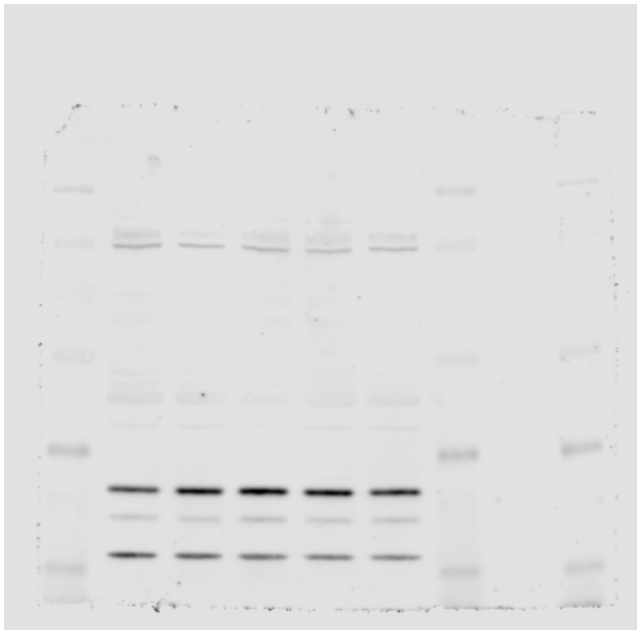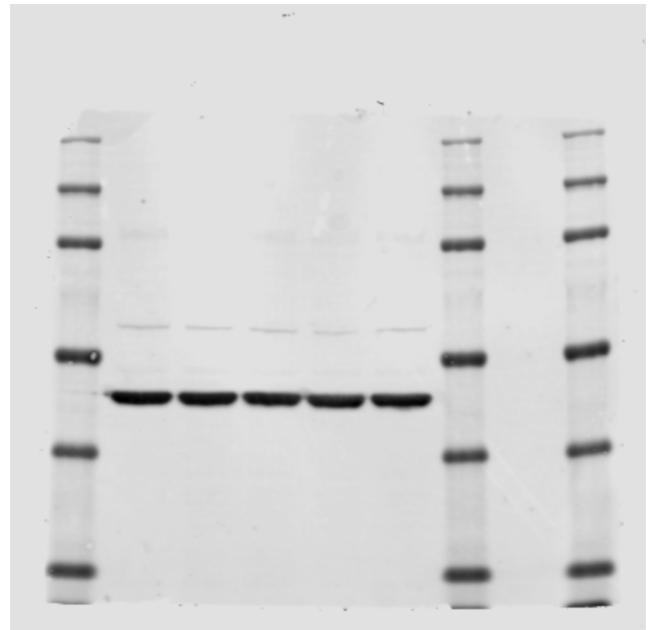

Supplement: NIHMS1791505-supplement-Uncropped_gel_corresponding_to_ED_figure_3C.pdf [file NIHMS1791505-supplement-Uncropped_gel_corresponding_to_ED_figure_3C.pdf]

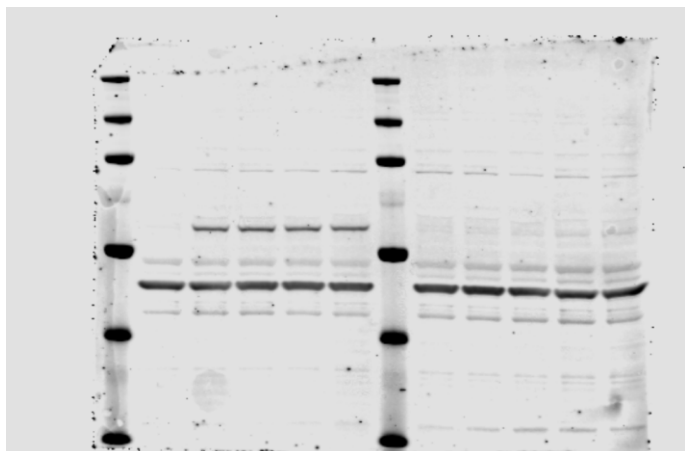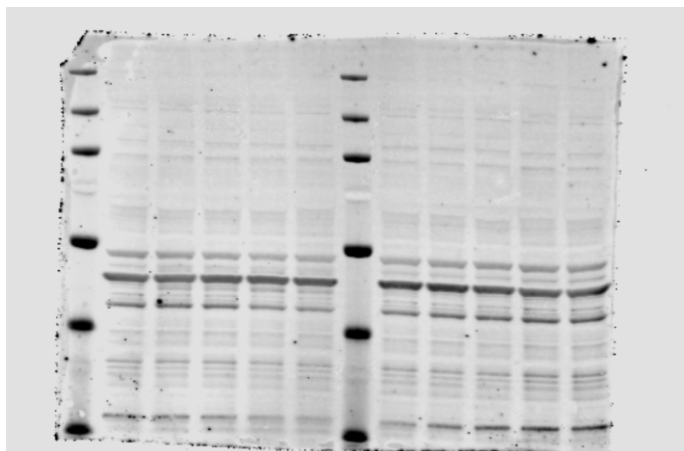

Supplement: NIHMS1791505-supplement-Uncropped_gel_corresponding_to_ED_figure_8A.pdf [file NIHMS1791505-supplement-Uncropped_gel_corresponding_to_ED_figure_8A.pdf]

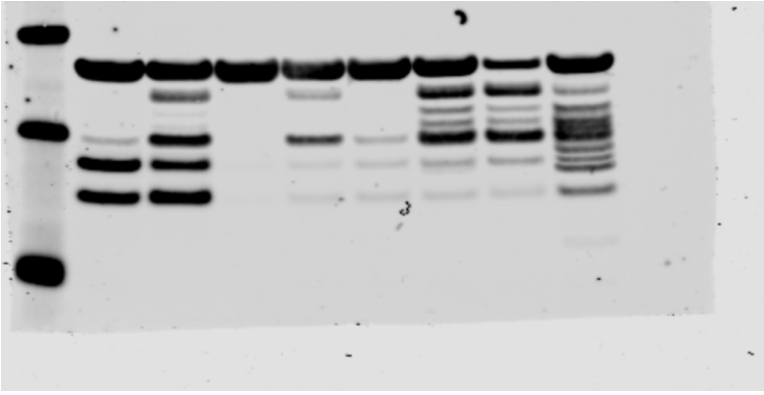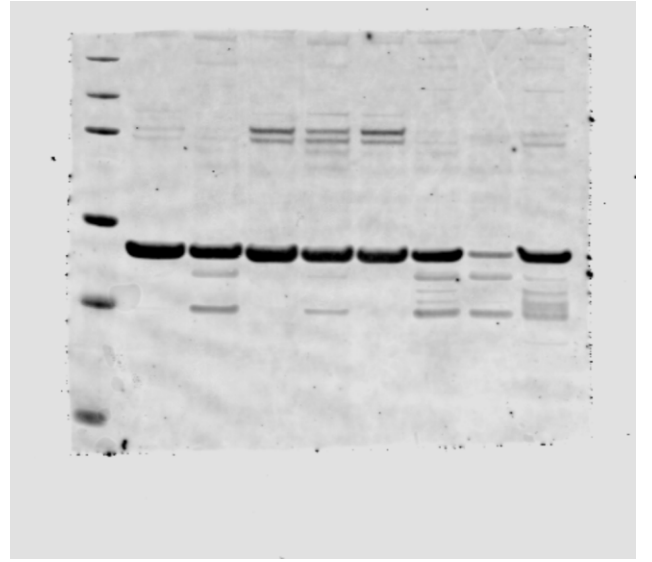

Supplement: NIHMS1791505-supplement-Uncropped_gel_corresponding_to_figure_2D.pdf [file NIHMS1791505-supplement-Uncropped_gel_corresponding_to_figure_2D.pdf]
